# Supplementary material for: GeneChaser: Identifying all biological and clinical conditions in which genes of interest are differentially expressed
Source: PubMed Central journal article supplement (PMC2629779; doi:10.1186/1471-2105-9-548), 2008-12-18
Supplement: 1471-2105-9-548-S1.pdf [file 1471-2105-9-548-S1.pdf]

Display Results :

Sort By

Show

Filter with : Comparison type

q value

Fold

Rank

Items 1 - 20 of 217 significant comparisons.

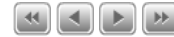

of 11

HomoloGene group **78027** for NANOG,Nanog homeobox was differentially expressed in 217 of 5706 comparisons.

|     |              |                                                                                      |                                                 |   |   |   |   |   |   |   |   | <a href="#">Link to this page</a> | <input checked="" type="checkbox"/> Start Over | <input checked="" type="checkbox"/> Legends |         |
|-----|--------------|--------------------------------------------------------------------------------------|-------------------------------------------------|---|---|---|---|---|---|---|---|-----------------------------------|------------------------------------------------|---------------------------------------------|---------|
| No. | Species Name | Title                                                                                | Differential Expression (A vs. B)               |   |   |   |   |   |   |   |   | Type                              | Fold (A/B)                                     | Rank (%ile)                                 | q value |
|     |              |                                                                                      | Fold                                            | 1 | 2 | 3 | 4 | 5 | 6 | 7 | 8 |                                   |                                                |                                             |         |
| 1   | Mus musculus | Transcription factor Zfx deficiency effect on embryonic and hematopoietic stem cells | embryonic stem cell vs. hematopoietic stem cell |   |   |   |   |   |   |   |   | cell type                         | 1000.0                                         | 0.2                                         | 0.006   |
| 2   | Mus musculus | Preimplantation embryo development (MOE430A)                                         | blastocyst vs. oocyte                           |   |   |   |   |   |   |   |   | development stage                 | 243.2                                          | 0.3                                         | 0.009   |
| 3   | Mus musculus | Preimplantation embryo development (MOE430A)                                         | 8-cell vs. oocyte                               |   |   |   |   |   |   |   |   | development stage                 | 138.1                                          | 0.5                                         | 0.009   |
| 4   | Mus musculus | Embryonic stem cell cholesterol metabolism mutants                                   | embryonic stem cell vs. liver                   |   |   |   |   |   |   |   |   | cell type                         | 90.9                                           | 0.9                                         | 0.000   |
| 5   | Mus musculus | Preimplantation embryo development (MG-U74A)                                         | blastocyst vs. oocyte                           |   |   |   |   |   |   |   |   | development stage                 | 87.5                                           | 1.5                                         | 0.012   |
| 6   | Mus musculus | Preimplantation embryo development (MOE430A)                                         | blastocyst vs. 2-cell                           |   |   |   |   |   |   |   |   | development stage                 | 69.7                                           | 0.3                                         | 0.009   |
| 7   | Homo sapiens | Expression data from different research centers                                      | universal RNA vs. liver                         |   |   |   |   |   |   |   |   | tissue                            | 62.5                                           | 0.2                                         | 0.006   |
| 8   | Mus musculus | Preimplantation embryo development (MOE430A)                                         | blastocyst vs. 1-cell                           |   |   |   |   |   |   |   |   | development stage                 | 58.9                                           | 2.1                                         | 0.007   |
| 9   | Mus musculus | Preimplantation embryo development (MG-U74A)                                         | 8-cell vs. oocyte                               |   |   |   |   |   |   |   |   | development stage                 | 54.3                                           | 1.9                                         | 0.010   |
| 10  | Mus musculus | Preimplantation embryo development (MG-U74A)                                         | 8-cell vs. 1-cell                               |   |   |   |   |   |   |   |   | development stage                 | 52.9                                           | 4.1                                         | 0.014   |
| 11  | Mus musculus | Preimplantation embryo development (MG-U74A)                                         | blastocyst vs. 2-cell                           |   |   |   |   |   |   |   |   | development stage                 | 45.4                                           | 0.8                                         | 0.047   |
| 12  | Mus musculus | Preimplantation embryo development (MOE430A)                                         | 8-cell vs. 2-cell                               |   |   |   |   |   |   |   |   | development stage                 | 39.6                                           | 0.2                                         | 0.011   |
