# Supplementary material for: GeneChaser: Identifying all biological and clinical conditions in which genes of interest are differentially expressed
Source: PubMed Central journal article supplement (PMC2629779; doi:10.1186/1471-2105-9-548), 2008-12-18
Supplement: 1471-2105-9-548-S3.pdf [file 1471-2105-9-548-S3.pdf]

[Link to this page](#)

| No.    | Title                                                                                                                  | Subset A vs. Subset B                           | Type               | Up Fold(A/B)                                                                                                                                                                                                                                                                       | Down Fold(A/B) | q value(Avg.) |       |         |       |         |        |         |      |         |                                                                                                                                                                                                                                                                               |  |        |         |       |       |       |       |        |       |      |       |
|--------|------------------------------------------------------------------------------------------------------------------------|-------------------------------------------------|--------------------|------------------------------------------------------------------------------------------------------------------------------------------------------------------------------------------------------------------------------------------------------------------------------------|----------------|---------------|-------|---------|-------|---------|--------|---------|------|---------|-------------------------------------------------------------------------------------------------------------------------------------------------------------------------------------------------------------------------------------------------------------------------------|--|--------|---------|-------|-------|-------|-------|--------|-------|------|-------|
| 1      | <b>Transcription factor Zfx deficiency effect on embryonic and hematopoietic stem cells</b>                            | embryonic stem cell vs. hematopoietic stem cell | cell type          | <b>619.0</b>                                                                                                                                                                                                                                                                       | <b>0.0</b>     | <b>0.0060</b> |       |         |       |         |        |         |      |         |                                                                                                                                                                                                                                                                               |  |        |         |       |       |       |       |        |       |      |       |
|        |                                                                                                                        |                                                 |                    | <table border="1"> <thead> <tr> <th>Symbol</th> <th>Fold</th> </tr> </thead> <tbody> <tr> <td>Lin28</td> <td>142.857</td> </tr> <tr> <td>Nanog</td> <td>1000</td> </tr> <tr> <td>Pou5f1</td> <td>333.333</td> </tr> <tr> <td>Sox2</td> <td>1000</td> </tr> </tbody> </table>       | Symbol         | Fold          | Lin28 | 142.857 | Nanog | 1000    | Pou5f1 | 333.333 | Sox2 | 1000    | <table border="1"> <thead> <tr> <th>Symbol</th> <th>q value</th> </tr> </thead> <tbody> <tr> <td>Lin28</td> <td>0.006</td> </tr> <tr> <td>Nanog</td> <td>0.006</td> </tr> <tr> <td>Pou5f1</td> <td>0.006</td> </tr> <tr> <td>Sox2</td> <td>0.006</td> </tr> </tbody> </table> |  | Symbol | q value | Lin28 | 0.006 | Nanog | 0.006 | Pou5f1 | 0.006 | Sox2 | 0.006 |
| Symbol | Fold                                                                                                                   |                                                 |                    |                                                                                                                                                                                                                                                                                    |                |               |       |         |       |         |        |         |      |         |                                                                                                                                                                                                                                                                               |  |        |         |       |       |       |       |        |       |      |       |
| Lin28  | 142.857                                                                                                                |                                                 |                    |                                                                                                                                                                                                                                                                                    |                |               |       |         |       |         |        |         |      |         |                                                                                                                                                                                                                                                                               |  |        |         |       |       |       |       |        |       |      |       |
| Nanog  | 1000                                                                                                                   |                                                 |                    |                                                                                                                                                                                                                                                                                    |                |               |       |         |       |         |        |         |      |         |                                                                                                                                                                                                                                                                               |  |        |         |       |       |       |       |        |       |      |       |
| Pou5f1 | 333.333                                                                                                                |                                                 |                    |                                                                                                                                                                                                                                                                                    |                |               |       |         |       |         |        |         |      |         |                                                                                                                                                                                                                                                                               |  |        |         |       |       |       |       |        |       |      |       |
| Sox2   | 1000                                                                                                                   |                                                 |                    |                                                                                                                                                                                                                                                                                    |                |               |       |         |       |         |        |         |      |         |                                                                                                                                                                                                                                                                               |  |        |         |       |       |       |       |        |       |      |       |
| Symbol | q value                                                                                                                |                                                 |                    |                                                                                                                                                                                                                                                                                    |                |               |       |         |       |         |        |         |      |         |                                                                                                                                                                                                                                                                               |  |        |         |       |       |       |       |        |       |      |       |
| Lin28  | 0.006                                                                                                                  |                                                 |                    |                                                                                                                                                                                                                                                                                    |                |               |       |         |       |         |        |         |      |         |                                                                                                                                                                                                                                                                               |  |        |         |       |       |       |       |        |       |      |       |
| Nanog  | 0.006                                                                                                                  |                                                 |                    |                                                                                                                                                                                                                                                                                    |                |               |       |         |       |         |        |         |      |         |                                                                                                                                                                                                                                                                               |  |        |         |       |       |       |       |        |       |      |       |
| Pou5f1 | 0.006                                                                                                                  |                                                 |                    |                                                                                                                                                                                                                                                                                    |                |               |       |         |       |         |        |         |      |         |                                                                                                                                                                                                                                                                               |  |        |         |       |       |       |       |        |       |      |       |
| Sox2   | 0.006                                                                                                                  |                                                 |                    |                                                                                                                                                                                                                                                                                    |                |               |       |         |       |         |        |         |      |         |                                                                                                                                                                                                                                                                               |  |        |         |       |       |       |       |        |       |      |       |
| 2      | <b>Sex specific transcription in somatic and reproductive tissues</b>                                                  | hypothalamus vs. liver                          | tissue             | <b>19.1</b>                                                                                                                                                                                                                                                                        | <b>0.0</b>     | <b>0.0088</b> |       |         |       |         |        |         |      |         |                                                                                                                                                                                                                                                                               |  |        |         |       |       |       |       |        |       |      |       |
| 3      | <b>Gonadal somatic cells during the critical period of sex determination: time course</b>                              | 10.5 dpc vs. 11.5 dpc                           | age                | <b>5.0</b>                                                                                                                                                                                                                                                                         | <b>0.0</b>     | <b>0.0168</b> |       |         |       |         |        |         |      |         |                                                                                                                                                                                                                                                                               |  |        |         |       |       |       |       |        |       |      |       |
|        |                                                                                                                        |                                                 |                    | <table border="1"> <thead> <tr> <th>Symbol</th> <th>Fold</th> </tr> </thead> <tbody> <tr> <td>Lin28</td> <td>4.5045</td> </tr> <tr> <td>Nanog</td> <td>2.48139</td> </tr> <tr> <td>Pou5f1</td> <td>3.20513</td> </tr> <tr> <td>Sox2</td> <td>9.70874</td> </tr> </tbody> </table>  | Symbol         | Fold          | Lin28 | 4.5045  | Nanog | 2.48139 | Pou5f1 | 3.20513 | Sox2 | 9.70874 | <table border="1"> <thead> <tr> <th>Symbol</th> <th>q value</th> </tr> </thead> <tbody> <tr> <td>Lin28</td> <td>0.006</td> </tr> <tr> <td>Nanog</td> <td>0.012</td> </tr> <tr> <td>Pou5f1</td> <td>0.036</td> </tr> <tr> <td>Sox2</td> <td>0.013</td> </tr> </tbody> </table> |  | Symbol | q value | Lin28 | 0.006 | Nanog | 0.012 | Pou5f1 | 0.036 | Sox2 | 0.013 |
| Symbol | Fold                                                                                                                   |                                                 |                    |                                                                                                                                                                                                                                                                                    |                |               |       |         |       |         |        |         |      |         |                                                                                                                                                                                                                                                                               |  |        |         |       |       |       |       |        |       |      |       |
| Lin28  | 4.5045                                                                                                                 |                                                 |                    |                                                                                                                                                                                                                                                                                    |                |               |       |         |       |         |        |         |      |         |                                                                                                                                                                                                                                                                               |  |        |         |       |       |       |       |        |       |      |       |
| Nanog  | 2.48139                                                                                                                |                                                 |                    |                                                                                                                                                                                                                                                                                    |                |               |       |         |       |         |        |         |      |         |                                                                                                                                                                                                                                                                               |  |        |         |       |       |       |       |        |       |      |       |
| Pou5f1 | 3.20513                                                                                                                |                                                 |                    |                                                                                                                                                                                                                                                                                    |                |               |       |         |       |         |        |         |      |         |                                                                                                                                                                                                                                                                               |  |        |         |       |       |       |       |        |       |      |       |
| Sox2   | 9.70874                                                                                                                |                                                 |                    |                                                                                                                                                                                                                                                                                    |                |               |       |         |       |         |        |         |      |         |                                                                                                                                                                                                                                                                               |  |        |         |       |       |       |       |        |       |      |       |
| Symbol | q value                                                                                                                |                                                 |                    |                                                                                                                                                                                                                                                                                    |                |               |       |         |       |         |        |         |      |         |                                                                                                                                                                                                                                                                               |  |        |         |       |       |       |       |        |       |      |       |
| Lin28  | 0.006                                                                                                                  |                                                 |                    |                                                                                                                                                                                                                                                                                    |                |               |       |         |       |         |        |         |      |         |                                                                                                                                                                                                                                                                               |  |        |         |       |       |       |       |        |       |      |       |
| Nanog  | 0.012                                                                                                                  |                                                 |                    |                                                                                                                                                                                                                                                                                    |                |               |       |         |       |         |        |         |      |         |                                                                                                                                                                                                                                                                               |  |        |         |       |       |       |       |        |       |      |       |
| Pou5f1 | 0.036                                                                                                                  |                                                 |                    |                                                                                                                                                                                                                                                                                    |                |               |       |         |       |         |        |         |      |         |                                                                                                                                                                                                                                                                               |  |        |         |       |       |       |       |        |       |      |       |
| Sox2   | 0.013                                                                                                                  |                                                 |                    |                                                                                                                                                                                                                                                                                    |                |               |       |         |       |         |        |         |      |         |                                                                                                                                                                                                                                                                               |  |        |         |       |       |       |       |        |       |      |       |
| 4      | <b>Transcription factors Nanog and Oct4 knockdown effect on embryonic stem cells</b>                                   | Control vs. Oct4 knockdown                      | protocol           | <b>1.2</b>                                                                                                                                                                                                                                                                         | <b>0.0</b>     | <b>0.0105</b> |       |         |       |         |        |         |      |         |                                                                                                                                                                                                                                                                               |  |        |         |       |       |       |       |        |       |      |       |
|        |                                                                                                                        |                                                 |                    | <table border="1"> <thead> <tr> <th>Symbol</th> <th>Fold</th> </tr> </thead> <tbody> <tr> <td>Lin28</td> <td>1.11857</td> </tr> <tr> <td>Nanog</td> <td>1.14416</td> </tr> <tr> <td>Pou5f1</td> <td>1.26422</td> </tr> <tr> <td>Sox2</td> <td>1.17647</td> </tr> </tbody> </table> | Symbol         | Fold          | Lin28 | 1.11857 | Nanog | 1.14416 | Pou5f1 | 1.26422 | Sox2 | 1.17647 | <table border="1"> <thead> <tr> <th>Symbol</th> <th>q value</th> </tr> </thead> <tbody> <tr> <td>Lin28</td> <td>0.016</td> </tr> <tr> <td>Nanog</td> <td>0.011</td> </tr> <tr> <td>Pou5f1</td> <td>0.006</td> </tr> <tr> <td>Sox2</td> <td>0.009</td> </tr> </tbody> </table> |  | Symbol | q value | Lin28 | 0.016 | Nanog | 0.011 | Pou5f1 | 0.006 | Sox2 | 0.009 |
| Symbol | Fold                                                                                                                   |                                                 |                    |                                                                                                                                                                                                                                                                                    |                |               |       |         |       |         |        |         |      |         |                                                                                                                                                                                                                                                                               |  |        |         |       |       |       |       |        |       |      |       |
| Lin28  | 1.11857                                                                                                                |                                                 |                    |                                                                                                                                                                                                                                                                                    |                |               |       |         |       |         |        |         |      |         |                                                                                                                                                                                                                                                                               |  |        |         |       |       |       |       |        |       |      |       |
| Nanog  | 1.14416                                                                                                                |                                                 |                    |                                                                                                                                                                                                                                                                                    |                |               |       |         |       |         |        |         |      |         |                                                                                                                                                                                                                                                                               |  |        |         |       |       |       |       |        |       |      |       |
| Pou5f1 | 1.26422                                                                                                                |                                                 |                    |                                                                                                                                                                                                                                                                                    |                |               |       |         |       |         |        |         |      |         |                                                                                                                                                                                                                                                                               |  |        |         |       |       |       |       |        |       |      |       |
| Sox2   | 1.17647                                                                                                                |                                                 |                    |                                                                                                                                                                                                                                                                                    |                |               |       |         |       |         |        |         |      |         |                                                                                                                                                                                                                                                                               |  |        |         |       |       |       |       |        |       |      |       |
| Symbol | q value                                                                                                                |                                                 |                    |                                                                                                                                                                                                                                                                                    |                |               |       |         |       |         |        |         |      |         |                                                                                                                                                                                                                                                                               |  |        |         |       |       |       |       |        |       |      |       |
| Lin28  | 0.016                                                                                                                  |                                                 |                    |                                                                                                                                                                                                                                                                                    |                |               |       |         |       |         |        |         |      |         |                                                                                                                                                                                                                                                                               |  |        |         |       |       |       |       |        |       |      |       |
| Nanog  | 0.011                                                                                                                  |                                                 |                    |                                                                                                                                                                                                                                                                                    |                |               |       |         |       |         |        |         |      |         |                                                                                                                                                                                                                                                                               |  |        |         |       |       |       |       |        |       |      |       |
| Pou5f1 | 0.006                                                                                                                  |                                                 |                    |                                                                                                                                                                                                                                                                                    |                |               |       |         |       |         |        |         |      |         |                                                                                                                                                                                                                                                                               |  |        |         |       |       |       |       |        |       |      |       |
| Sox2   | 0.009                                                                                                                  |                                                 |                    |                                                                                                                                                                                                                                                                                    |                |               |       |         |       |         |        |         |      |         |                                                                                                                                                                                                                                                                               |  |        |         |       |       |       |       |        |       |      |       |
| 5      | <b>Stearoyl-CoA desaturase 1-deficient mutants on a very low-fat, high-carbohydrate diet: liver expression profile</b> | wild type vs. Scd1 null                         | genotype/variation | <b>1.1</b>                                                                                                                                                                                                                                                                         | <b>0.0</b>     | <b>0.0173</b> |       |         |       |         |        |         |      |         |                                                                                                                                                                                                                                                                               |  |        |         |       |       |       |       |        |       |      |       |
|        |                                                                                                                        |                                                 |                    | <table border="1"> <thead> <tr> <th>Symbol</th> <th>Fold</th> </tr> </thead> <tbody> <tr> <td>Lin28</td> <td>1.10988</td> </tr> <tr> <td>Nanog</td> <td>1.13895</td> </tr> <tr> <td>Pou5f1</td> <td>1.09409</td> </tr> <tr> <td>Sox2</td> <td>1.10132</td> </tr> </tbody> </table> | Symbol         | Fold          | Lin28 | 1.10988 | Nanog | 1.13895 | Pou5f1 | 1.09409 | Sox2 | 1.10132 | <table border="1"> <thead> <tr> <th>Symbol</th> <th>q value</th> </tr> </thead> <tbody> <tr> <td>Lin28</td> <td>0.024</td> </tr> <tr> <td>Nanog</td> <td>0.01</td> </tr> <tr> <td>Pou5f1</td> <td>0.029</td> </tr> <tr> <td>Sox2</td> <td>0.006</td> </tr> </tbody> </table>  |  | Symbol | q value | Lin28 | 0.024 | Nanog | 0.01  | Pou5f1 | 0.029 | Sox2 | 0.006 |
| Symbol | Fold                                                                                                                   |                                                 |                    |                                                                                                                                                                                                                                                                                    |                |               |       |         |       |         |        |         |      |         |                                                                                                                                                                                                                                                                               |  |        |         |       |       |       |       |        |       |      |       |
| Lin28  | 1.10988                                                                                                                |                                                 |                    |                                                                                                                                                                                                                                                                                    |                |               |       |         |       |         |        |         |      |         |                                                                                                                                                                                                                                                                               |  |        |         |       |       |       |       |        |       |      |       |
| Nanog  | 1.13895                                                                                                                |                                                 |                    |                                                                                                                                                                                                                                                                                    |                |               |       |         |       |         |        |         |      |         |                                                                                                                                                                                                                                                                               |  |        |         |       |       |       |       |        |       |      |       |
| Pou5f1 | 1.09409                                                                                                                |                                                 |                    |                                                                                                                                                                                                                                                                                    |                |               |       |         |       |         |        |         |      |         |                                                                                                                                                                                                                                                                               |  |        |         |       |       |       |       |        |       |      |       |
| Sox2   | 1.10132                                                                                                                |                                                 |                    |                                                                                                                                                                                                                                                                                    |                |               |       |         |       |         |        |         |      |         |                                                                                                                                                                                                                                                                               |  |        |         |       |       |       |       |        |       |      |       |
| Symbol | q value                                                                                                                |                                                 |                    |                                                                                                                                                                                                                                                                                    |                |               |       |         |       |         |        |         |      |         |                                                                                                                                                                                                                                                                               |  |        |         |       |       |       |       |        |       |      |       |
| Lin28  | 0.024                                                                                                                  |                                                 |                    |                                                                                                                                                                                                                                                                                    |                |               |       |         |       |         |        |         |      |         |                                                                                                                                                                                                                                                                               |  |        |         |       |       |       |       |        |       |      |       |
| Nanog  | 0.01                                                                                                                   |                                                 |                    |                                                                                                                                                                                                                                                                                    |                |               |       |         |       |         |        |         |      |         |                                                                                                                                                                                                                                                                               |  |        |         |       |       |       |       |        |       |      |       |
| Pou5f1 | 0.029                                                                                                                  |                                                 |                    |                                                                                                                                                                                                                                                                                    |                |               |       |         |       |         |        |         |      |         |                                                                                                                                                                                                                                                                               |  |        |         |       |       |       |       |        |       |      |       |
| Sox2   | 0.006                                                                                                                  |                                                 |                    |                                                                                                                                                                                                                                                                                    |                |               |       |         |       |         |        |         |      |         |                                                                                                                                                                                                                                                                               |  |        |         |       |       |       |       |        |       |      |       |
