# Supplementary material for: GeneChaser: Identifying all biological and clinical conditions in which genes of interest are differentially expressed
Source: PubMed Central journal article supplement (PMC2629779; doi:10.1186/1471-2105-9-548), 2008-12-18
Supplement: 1471-2105-9-548-S4.pdf [file 1471-2105-9-548-S4.pdf]

[Link to this page](#)

| No.    | Title                                                                                     | Subset A vs. Subset B                                                                                        | Type          | Up Fold(A/B)                                                                                                                                                                                                                                                                      | Down Fold(A/B) | q value(Avg.) |       |         |       |         |        |         |      |        |                                                                                                                                                                                                                                                                       |        |         |       |       |       |   |        |   |      |       |
|--------|-------------------------------------------------------------------------------------------|--------------------------------------------------------------------------------------------------------------|---------------|-----------------------------------------------------------------------------------------------------------------------------------------------------------------------------------------------------------------------------------------------------------------------------------|----------------|---------------|-------|---------|-------|---------|--------|---------|------|--------|-----------------------------------------------------------------------------------------------------------------------------------------------------------------------------------------------------------------------------------------------------------------------|--------|---------|-------|-------|-------|---|--------|---|------|-------|
| 1      | <a href="#">Expression data from different research centers</a>                           | universal RNA vs. liver                                                                                      | tissue        | 25.3                                                                                                                                                                                                                                                                              | 0.0            | 0.0060        |       |         |       |         |        |         |      |        |                                                                                                                                                                                                                                                                       |        |         |       |       |       |   |        |   |      |       |
| 2      | <a href="#">Expression data from different research centers</a>                           | universal RNA vs. spleen                                                                                     | tissue        | 15.1                                                                                                                                                                                                                                                                              | 0.0            | 0.0078        |       |         |       |         |        |         |      |        |                                                                                                                                                                                                                                                                       |        |         |       |       |       |   |        |   |      |       |
| 3      | <a href="#">Expression data from different research centers</a>                           | universal RNA vs. kidney                                                                                     | tissue        | 11.7                                                                                                                                                                                                                                                                              | 0.0            | 0.0015        |       |         |       |         |        |         |      |        |                                                                                                                                                                                                                                                                       |        |         |       |       |       |   |        |   |      |       |
| 4      | <a href="#">Immortalized endothelial cell line response to atorvastatin</a>               | primary vs. immortalized                                                                                     | cell line     | 5.9                                                                                                                                                                                                                                                                               | 0.0            | 0.0053        |       |         |       |         |        |         |      |        |                                                                                                                                                                                                                                                                       |        |         |       |       |       |   |        |   |      |       |
| 5      | <a href="#">Hematopoietic stem cell engraftment in goat</a>                               | Capra hircus vs. Homo sapiens                                                                                | species       | 5.4                                                                                                                                                                                                                                                                               | 0.0            | 0.0133        |       |         |       |         |        |         |      |        |                                                                                                                                                                                                                                                                       |        |         |       |       |       |   |        |   |      |       |
| 6      | <a href="#">Cutaneous malignant melanoma</a>                                              | normal vs. malignant melanoma                                                                                | disease state | 5.2                                                                                                                                                                                                                                                                               | 0.0            | 0.0127        |       |         |       |         |        |         |      |        |                                                                                                                                                                                                                                                                       |        |         |       |       |       |   |        |   |      |       |
|        |                                                                                           |                                                                                                              |               | <table border="1"> <thead> <tr> <th>Symbol</th> <th>Fold</th> </tr> </thead> <tbody> <tr> <td>LIN28</td> <td>2.31481</td> </tr> <tr> <td>NANOG</td> <td>13.3333</td> </tr> <tr> <td>POU5F1</td> <td>3.81679</td> </tr> <tr> <td>SOX2</td> <td>1.5083</td> </tr> </tbody> </table> | Symbol         | Fold          | LIN28 | 2.31481 | NANOG | 13.3333 | POU5F1 | 3.81679 | SOX2 | 1.5083 | <table border="1"> <thead> <tr> <th>Symbol</th> <th>q value</th> </tr> </thead> <tbody> <tr> <td>LIN28</td> <td>0.033</td> </tr> <tr> <td>NANOG</td> <td>0</td> </tr> <tr> <td>POU5F1</td> <td>0</td> </tr> <tr> <td>SOX2</td> <td>0.018</td> </tr> </tbody> </table> | Symbol | q value | LIN28 | 0.033 | NANOG | 0 | POU5F1 | 0 | SOX2 | 0.018 |
| Symbol | Fold                                                                                      |                                                                                                              |               |                                                                                                                                                                                                                                                                                   |                |               |       |         |       |         |        |         |      |        |                                                                                                                                                                                                                                                                       |        |         |       |       |       |   |        |   |      |       |
| LIN28  | 2.31481                                                                                   |                                                                                                              |               |                                                                                                                                                                                                                                                                                   |                |               |       |         |       |         |        |         |      |        |                                                                                                                                                                                                                                                                       |        |         |       |       |       |   |        |   |      |       |
| NANOG  | 13.3333                                                                                   |                                                                                                              |               |                                                                                                                                                                                                                                                                                   |                |               |       |         |       |         |        |         |      |        |                                                                                                                                                                                                                                                                       |        |         |       |       |       |   |        |   |      |       |
| POU5F1 | 3.81679                                                                                   |                                                                                                              |               |                                                                                                                                                                                                                                                                                   |                |               |       |         |       |         |        |         |      |        |                                                                                                                                                                                                                                                                       |        |         |       |       |       |   |        |   |      |       |
| SOX2   | 1.5083                                                                                    |                                                                                                              |               |                                                                                                                                                                                                                                                                                   |                |               |       |         |       |         |        |         |      |        |                                                                                                                                                                                                                                                                       |        |         |       |       |       |   |        |   |      |       |
| Symbol | q value                                                                                   |                                                                                                              |               |                                                                                                                                                                                                                                                                                   |                |               |       |         |       |         |        |         |      |        |                                                                                                                                                                                                                                                                       |        |         |       |       |       |   |        |   |      |       |
| LIN28  | 0.033                                                                                     |                                                                                                              |               |                                                                                                                                                                                                                                                                                   |                |               |       |         |       |         |        |         |      |        |                                                                                                                                                                                                                                                                       |        |         |       |       |       |   |        |   |      |       |
| NANOG  | 0                                                                                         |                                                                                                              |               |                                                                                                                                                                                                                                                                                   |                |               |       |         |       |         |        |         |      |        |                                                                                                                                                                                                                                                                       |        |         |       |       |       |   |        |   |      |       |
| POU5F1 | 0                                                                                         |                                                                                                              |               |                                                                                                                                                                                                                                                                                   |                |               |       |         |       |         |        |         |      |        |                                                                                                                                                                                                                                                                       |        |         |       |       |       |   |        |   |      |       |
| SOX2   | 0.018                                                                                     |                                                                                                              |               |                                                                                                                                                                                                                                                                                   |                |               |       |         |       |         |        |         |      |        |                                                                                                                                                                                                                                                                       |        |         |       |       |       |   |        |   |      |       |
| 7      | <a href="#">Glioma-derived stem cell factor effect on angiogenesis in the brain</a>       | oligodendrogliomas vs. non-tumor                                                                             | disease state | 2.1                                                                                                                                                                                                                                                                               | 0.0            | 0.0078        |       |         |       |         |        |         |      |        |                                                                                                                                                                                                                                                                       |        |         |       |       |       |   |        |   |      |       |
| 8      | <a href="#">Glioma-derived stem cell factor effect on angiogenesis in the brain</a>       | tumor grade II vs. not applicable                                                                            | tissue        | 2.1                                                                                                                                                                                                                                                                               | 0.0            | 0.0068        |       |         |       |         |        |         |      |        |                                                                                                                                                                                                                                                                       |        |         |       |       |       |   |        |   |      |       |
| 9      | <a href="#">Carcinoma in situ lesions of the urinary bladder</a>                          | normal urothelium vs. superficial transitional cell carcinoma w/ surrounding carcinoma in situ lesion        | specimen      | 1.9                                                                                                                                                                                                                                                                               | 0.0            | 0.0005        |       |         |       |         |        |         |      |        |                                                                                                                                                                                                                                                                       |        |         |       |       |       |   |        |   |      |       |
| 10     | <a href="#">Carcinoma in situ lesions of the urinary bladder</a>                          | carcinoma in situ lesion vs. superficial transitional cell carcinoma w/ surrounding carcinoma in situ lesion | specimen      | 1.9                                                                                                                                                                                                                                                                               | 0.0            | 0.0110        |       |         |       |         |        |         |      |        |                                                                                                                                                                                                                                                                       |        |         |       |       |       |   |        |   |      |       |
| 11     | <a href="#">Carcinoma in situ lesions of the urinary bladder</a>                          | normal urothelium vs. muscle invasive carcinoma                                                              | specimen      | 1.7                                                                                                                                                                                                                                                                               | 0.0            | 0.0010        |       |         |       |         |        |         |      |        |                                                                                                                                                                                                                                                                       |        |         |       |       |       |   |        |   |      |       |
| 12     | <a href="#">Carcinoma in situ lesions of the urinary bladder</a>                          | carcinoma in situ lesion vs. muscle invasive carcinoma                                                       | specimen      | 1.7                                                                                                                                                                                                                                                                               | 0.0            | 0.0105        |       |         |       |         |        |         |      |        |                                                                                                                                                                                                                                                                       |        |         |       |       |       |   |        |   |      |       |
| 13     | <a href="#">Transmigrated neutrophils in the alveolar space of endotoxin-exposed lung</a> | 70 vs. 32                                                                                                    | individual    | 1.6                                                                                                                                                                                                                                                                               | 0.0            | 0.0413        |       |         |       |         |        |         |      |        |                                                                                                                                                                                                                                                                       |        |         |       |       |       |   |        |   |      |       |
| 14     | <a href="#">Transmigrated neutrophils in the alveolar space of endotoxin-exposed lung</a> | 70 vs. 48                                                                                                    | individual    | 1.5                                                                                                                                                                                                                                                                               | 0.0            | 0.0357        |       |         |       |         |        |         |      |        |                                                                                                                                                                                                                                                                       |        |         |       |       |       |   |        |   |      |       |
