# Supplementary material for: GeneChaser: Identifying all biological and clinical conditions in which genes of interest are differentially expressed
Source: Springer Nature journal article supplement (doi:10.1186/1471-2105-9-548), 2008-12-01
Supplement: 12859_2008_2533_MOESM2_ESM.pdf [file 12859_2008_2533_MOESM2_ESM.pdf]

Display Results :                      Sort By                      Show                      Filter with : Comparison type                      q value                      Fold                      Rank

Items 1 - 4 of 4 significant comparisons.

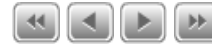

of 1

HomoloGene group **78027** for NANOG,Nanog homeobox was differentially expressed in 4 of 5706 comparisons.

[Link to this page](#)     Start Over     Legends

| No. | Species Name | Title                                                                                | Differential Expression (A vs. B) |   |   |   |   |   |   |   |   | Type  | Fold (A/B) | Rank (%ile) | q value |
|-----|--------------|--------------------------------------------------------------------------------------|-----------------------------------|---|---|---|---|---|---|---|---|-------|------------|-------------|---------|
|     |              |                                                                                      | Fold                              | 1 | 2 | 3 | 4 | 5 | 6 | 7 | 8 |       |            |             |         |
| 1   | Homo sapiens | <b>Bexarotene effect on gemcitabine resistant non-small lung cancer cell line</b>    |                                   |   |   |   |   |   |   |   |   | agent | 6.4        | 1.6         | 0.030   |
|     |              | gemcitabine <b>vs.</b> untreated                                                     |                                   |   |   |   |   |   |   |   |   |       |            |             |         |
| 2   | Homo sapiens | <b>Bexarotene effect on gemcitabine resistant non-small lung cancer cell line</b>    |                                   |   |   |   |   |   |   |   |   | agent | 4.6        | 7.6         | 0.043   |
|     |              | vehicle <b>vs.</b> untreated                                                         |                                   |   |   |   |   |   |   |   |   |       |            |             |         |
| 3   | Homo sapiens | <b>Presymptomatic and symptomatic malaria: peripheral blood mononuclear cells</b>    |                                   |   |   |   |   |   |   |   |   | agent | 2.9        | 3.5         | 0.003   |
|     |              | untreated <b>vs.</b> chloroquine treated                                             |                                   |   |   |   |   |   |   |   |   |       |            |             |         |
| 4   | Mus musculus | <b>Embryonic stem cell differentiation induced by various chemicals: time course</b> |                                   |   |   |   |   |   |   |   |   | agent | 2.2        | 33.3        | 0.046   |
|     |              | RA <b>vs.</b> DMSO                                                                   |                                   |   |   |   |   |   |   |   |   |       |            |             |         |

Display Results :                      Sort By                      Show                      Filter with : Comparison type                      q value                      Fold                      Rank
