# Supplementary material for: GeneChaser: Identifying all biological and clinical conditions in which genes of interest are differentially expressed
Source: Springer Nature journal article supplement (doi:10.1186/1471-2105-9-548), 2008-12-01
Supplement: 12859_2008_2533_MOESM5_ESM.pdf [file 12859_2008_2533_MOESM5_ESM.pdf]

Display Results :      Sort By      Show      Filter with : Comparison type      q value      Fold      Rank

Items 1 - 19 of 19 significant comparisons.

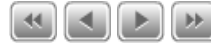

of 1

HomoloGene group **78027** for NANOG,Nanog homeobox was differentially expressed in 19 of 5706 comparisons.

[Link to this page](#)     Start Over     Legends

| No. | Species Name | Title                                                                             | Differential Expression (A vs. B)                                                  |   |   |   |   |   |   |   |   | Type          | Fold (A/B) | Rank (%ile) | q value |
|-----|--------------|-----------------------------------------------------------------------------------|------------------------------------------------------------------------------------|---|---|---|---|---|---|---|---|---------------|------------|-------------|---------|
|     |              |                                                                                   | Fold                                                                               | 1 | 2 | 3 | 4 | 5 | 6 | 7 | 8 |               |            |             |         |
| 1   | Homo sapiens | <b>Teratozoospermia (HG-U133 2.0 )</b>                                            |                                                                                    |   |   |   |   |   |   |   |   | disease state | 20.2       | 0.5         | 0.000   |
|     |              |                                                                                   | teratozoospermia <b>vs.</b> normal                                                 |   |   |   |   |   |   |   |   |               |            |             |         |
| 2   | Homo sapiens | <b>Cutaneous malignant melanoma</b>                                               |                                                                                    |   |   |   |   |   |   |   |   | disease state | 13.3       | 1.4         | 0.000   |
|     |              |                                                                                   | normal <b>vs.</b> malignant melanoma                                               |   |   |   |   |   |   |   |   |               |            |             |         |
| 3   | Homo sapiens | <b>Cutaneous malignant melanoma</b>                                               |                                                                                    |   |   |   |   |   |   |   |   | disease state | 6.1        | 40.4        | 0.004   |
|     |              |                                                                                   | benign nevi <b>vs.</b> malignant melanoma                                          |   |   |   |   |   |   |   |   |               |            |             |         |
| 4   | Homo sapiens | <b>Presymptomatic and symptomatic malaria: peripheral blood mononuclear cells</b> |                                                                                    |   |   |   |   |   |   |   |   | disease state | 4.5        | 3.3         | 0.000   |
|     |              |                                                                                   | uninfected <b>vs.</b> symptomatic, naturally acquired                              |   |   |   |   |   |   |   |   |               |            |             |         |
| 5   | Homo sapiens | <b>Malignant fibrous histiocytoma and various soft tissue sarcomas</b>            |                                                                                    |   |   |   |   |   |   |   |   | disease state | 4.3        | 3.3         | 0.000   |
|     |              |                                                                                   | synovial sarcoma <b>vs.</b> malignant fibrous histiocytoma                         |   |   |   |   |   |   |   |   |               |            |             |         |
| 6   | Homo sapiens | <b>Prostate cancer progression</b>                                                |                                                                                    |   |   |   |   |   |   |   |   | disease state | 3.6        | 15.4        | 0.022   |
|     |              |                                                                                   | benign <b>vs.</b> metastatic                                                       |   |   |   |   |   |   |   |   |               |            |             |         |
| 7   | Homo sapiens | <b>Prostate cancer progression</b>                                                |                                                                                    |   |   |   |   |   |   |   |   | disease state | 3.5        | 25.5        | 0.024   |
|     |              |                                                                                   | primary <b>vs.</b> metastatic                                                      |   |   |   |   |   |   |   |   |               |            |             |         |
| 8   | Homo sapiens | <b>Presymptomatic and symptomatic malaria: peripheral blood mononuclear cells</b> |                                                                                    |   |   |   |   |   |   |   |   | disease state | 3.4        | 7.7         | 0.000   |
|     |              |                                                                                   | presymptomatic, experimentally acquired <b>vs.</b> symptomatic, naturally acquired |   |   |   |   |   |   |   |   |               |            |             |         |
| 9   | Homo sapiens | <b>Plasma cell dyscrasias</b>                                                     |                                                                                    |   |   |   |   |   |   |   |   | disease state | 3.4        | 13.8        | 0.017   |
|     |              |                                                                                   | monoclonal gammopathy of undetermined significance <b>vs.</b> plasma cell leukemia |   |   |   |   |   |   |   |   |               |            |             |         |
