# Supplementary material for: GeneChaser: Identifying all biological and clinical conditions in which genes of interest are differentially expressed
Source: Springer Nature journal article supplement (doi:10.1186/1471-2105-9-548), 2008-12-01
Supplement: 12859_2008_2533_MOESM6_ESM.pdf [file 12859_2008_2533_MOESM6_ESM.pdf]

[Link to this page](#)

| No.    | Title                                                                           | Subset A vs. Subset B                                                       | Type          | Up Fold(A/B)                                                                                                                                                                                                                            | Down Fold(A/B) | q value(Avg.) |       |         |        |         |      |         |                                                                                                                                                                                                                                     |        |         |       |       |        |       |      |       |
|--------|---------------------------------------------------------------------------------|-----------------------------------------------------------------------------|---------------|-----------------------------------------------------------------------------------------------------------------------------------------------------------------------------------------------------------------------------------------|----------------|---------------|-------|---------|--------|---------|------|---------|-------------------------------------------------------------------------------------------------------------------------------------------------------------------------------------------------------------------------------------|--------|---------|-------|-------|--------|-------|------|-------|
| 1      | Expression data from different research centers                                 | universal RNA vs. liver                                                     | tissue        | 28.7                                                                                                                                                                                                                                    | 0.0            | 0.0060        |       |         |        |         |      |         |                                                                                                                                                                                                                                     |        |         |       |       |        |       |      |       |
| 2      | Expression data from different research centers                                 | universal RNA vs. spleen                                                    | tissue        | 15.9                                                                                                                                                                                                                                    | 0.0            | 0.0083        |       |         |        |         |      |         |                                                                                                                                                                                                                                     |        |         |       |       |        |       |      |       |
| 3      | Expression data from different research centers                                 | universal RNA vs. kidney                                                    | tissue        | 9.7                                                                                                                                                                                                                                     | 0.0            | 0.0020        |       |         |        |         |      |         |                                                                                                                                                                                                                                     |        |         |       |       |        |       |      |       |
| 4      | Teratozoospermia (HG-U133 2.0)                                                  | teratozoospermia vs. normal                                                 | disease state | 8.2                                                                                                                                                                                                                                     | 0.0            | 0.0000        |       |         |        |         |      |         |                                                                                                                                                                                                                                     |        |         |       |       |        |       |      |       |
|        |                                                                                 |                                                                             |               | <table border="1"> <thead> <tr> <th>Symbol</th> <th>Fold</th> </tr> </thead> <tbody> <tr> <td>NANOG</td> <td>20.236</td> </tr> <tr> <td>POU5F1</td> <td>2.037</td> </tr> <tr> <td>SOX2</td> <td>2.275</td> </tr> </tbody> </table>      | Symbol         | Fold          | NANOG | 20.236  | POU5F1 | 2.037   | SOX2 | 2.275   | <table border="1"> <thead> <tr> <th>Symbol</th> <th>q value</th> </tr> </thead> <tbody> <tr> <td>NANOG</td> <td>0</td> </tr> <tr> <td>POU5F1</td> <td>0</td> </tr> <tr> <td>SOX2</td> <td>0</td> </tr> </tbody> </table>            | Symbol | q value | NANOG | 0     | POU5F1 | 0     | SOX2 | 0     |
| Symbol | Fold                                                                            |                                                                             |               |                                                                                                                                                                                                                                         |                |               |       |         |        |         |      |         |                                                                                                                                                                                                                                     |        |         |       |       |        |       |      |       |
| NANOG  | 20.236                                                                          |                                                                             |               |                                                                                                                                                                                                                                         |                |               |       |         |        |         |      |         |                                                                                                                                                                                                                                     |        |         |       |       |        |       |      |       |
| POU5F1 | 2.037                                                                           |                                                                             |               |                                                                                                                                                                                                                                         |                |               |       |         |        |         |      |         |                                                                                                                                                                                                                                     |        |         |       |       |        |       |      |       |
| SOX2   | 2.275                                                                           |                                                                             |               |                                                                                                                                                                                                                                         |                |               |       |         |        |         |      |         |                                                                                                                                                                                                                                     |        |         |       |       |        |       |      |       |
| Symbol | q value                                                                         |                                                                             |               |                                                                                                                                                                                                                                         |                |               |       |         |        |         |      |         |                                                                                                                                                                                                                                     |        |         |       |       |        |       |      |       |
| NANOG  | 0                                                                               |                                                                             |               |                                                                                                                                                                                                                                         |                |               |       |         |        |         |      |         |                                                                                                                                                                                                                                     |        |         |       |       |        |       |      |       |
| POU5F1 | 0                                                                               |                                                                             |               |                                                                                                                                                                                                                                         |                |               |       |         |        |         |      |         |                                                                                                                                                                                                                                     |        |         |       |       |        |       |      |       |
| SOX2   | 0                                                                               |                                                                             |               |                                                                                                                                                                                                                                         |                |               |       |         |        |         |      |         |                                                                                                                                                                                                                                     |        |         |       |       |        |       |      |       |
| 5      | Immortalized endothelial cell line response to atorvastatin                     | primary vs. immortalized                                                    | cell line     | 6.7                                                                                                                                                                                                                                     | 0.0            | 0.0063        |       |         |        |         |      |         |                                                                                                                                                                                                                                     |        |         |       |       |        |       |      |       |
| 6      | Cutaneous malignant melanoma                                                    | normal vs. malignant melanoma                                               | disease state | 6.2                                                                                                                                                                                                                                     | 0.0            | 0.0060        |       |         |        |         |      |         |                                                                                                                                                                                                                                     |        |         |       |       |        |       |      |       |
|        |                                                                                 |                                                                             |               | <table border="1"> <thead> <tr> <th>Symbol</th> <th>Fold</th> </tr> </thead> <tbody> <tr> <td>NANOG</td> <td>13.3333</td> </tr> <tr> <td>POU5F1</td> <td>3.81679</td> </tr> <tr> <td>SOX2</td> <td>1.5083</td> </tr> </tbody> </table>  | Symbol         | Fold          | NANOG | 13.3333 | POU5F1 | 3.81679 | SOX2 | 1.5083  | <table border="1"> <thead> <tr> <th>Symbol</th> <th>q value</th> </tr> </thead> <tbody> <tr> <td>NANOG</td> <td>0</td> </tr> <tr> <td>POU5F1</td> <td>0</td> </tr> <tr> <td>SOX2</td> <td>0.018</td> </tr> </tbody> </table>        | Symbol | q value | NANOG | 0     | POU5F1 | 0     | SOX2 | 0.018 |
| Symbol | Fold                                                                            |                                                                             |               |                                                                                                                                                                                                                                         |                |               |       |         |        |         |      |         |                                                                                                                                                                                                                                     |        |         |       |       |        |       |      |       |
| NANOG  | 13.3333                                                                         |                                                                             |               |                                                                                                                                                                                                                                         |                |               |       |         |        |         |      |         |                                                                                                                                                                                                                                     |        |         |       |       |        |       |      |       |
| POU5F1 | 3.81679                                                                         |                                                                             |               |                                                                                                                                                                                                                                         |                |               |       |         |        |         |      |         |                                                                                                                                                                                                                                     |        |         |       |       |        |       |      |       |
| SOX2   | 1.5083                                                                          |                                                                             |               |                                                                                                                                                                                                                                         |                |               |       |         |        |         |      |         |                                                                                                                                                                                                                                     |        |         |       |       |        |       |      |       |
| Symbol | q value                                                                         |                                                                             |               |                                                                                                                                                                                                                                         |                |               |       |         |        |         |      |         |                                                                                                                                                                                                                                     |        |         |       |       |        |       |      |       |
| NANOG  | 0                                                                               |                                                                             |               |                                                                                                                                                                                                                                         |                |               |       |         |        |         |      |         |                                                                                                                                                                                                                                     |        |         |       |       |        |       |      |       |
| POU5F1 | 0                                                                               |                                                                             |               |                                                                                                                                                                                                                                         |                |               |       |         |        |         |      |         |                                                                                                                                                                                                                                     |        |         |       |       |        |       |      |       |
| SOX2   | 0.018                                                                           |                                                                             |               |                                                                                                                                                                                                                                         |                |               |       |         |        |         |      |         |                                                                                                                                                                                                                                     |        |         |       |       |        |       |      |       |
| 7      | Hematopoietic stem cell engraftment in goat                                     | Capra hircus vs. Homo sapiens                                               | species       | 6.1                                                                                                                                                                                                                                     | 0.0            | 0.0127        |       |         |        |         |      |         |                                                                                                                                                                                                                                     |        |         |       |       |        |       |      |       |
| 8      | Whole blood RNA isolation and leukocyte RNA purification: comparison of methods | PAXgene vs. buffy coat                                                      | protocol      | 4.2                                                                                                                                                                                                                                     | 0.0            | 0.0143        |       |         |        |         |      |         |                                                                                                                                                                                                                                     |        |         |       |       |        |       |      |       |
| 9      | Whole blood RNA isolation and leukocyte RNA purification: comparison of methods | whole blood vs. leukocyte                                                   | tissue        | 4.2                                                                                                                                                                                                                                     | 0.0            | 0.0143        |       |         |        |         |      |         |                                                                                                                                                                                                                                     |        |         |       |       |        |       |      |       |
| 10     | Presymptomatic and symptomatic malaria: peripheral blood mononuclear cells      | uninfected vs. symptomatic, naturally acquired                              | disease state | 3.3                                                                                                                                                                                                                                     | 0.0            | 0.0000        |       |         |        |         |      |         |                                                                                                                                                                                                                                     |        |         |       |       |        |       |      |       |
|        |                                                                                 |                                                                             |               | <table border="1"> <thead> <tr> <th>Symbol</th> <th>Fold</th> </tr> </thead> <tbody> <tr> <td>NANOG</td> <td>4.4843</td> </tr> <tr> <td>POU5F1</td> <td>2.34742</td> </tr> <tr> <td>SOX2</td> <td>3.0303</td> </tr> </tbody> </table>   | Symbol         | Fold          | NANOG | 4.4843  | POU5F1 | 2.34742 | SOX2 | 3.0303  | <table border="1"> <thead> <tr> <th>Symbol</th> <th>q value</th> </tr> </thead> <tbody> <tr> <td>NANOG</td> <td>0</td> </tr> <tr> <td>POU5F1</td> <td>0</td> </tr> <tr> <td>SOX2</td> <td>0</td> </tr> </tbody> </table>            | Symbol | q value | NANOG | 0     | POU5F1 | 0     | SOX2 | 0     |
| Symbol | Fold                                                                            |                                                                             |               |                                                                                                                                                                                                                                         |                |               |       |         |        |         |      |         |                                                                                                                                                                                                                                     |        |         |       |       |        |       |      |       |
| NANOG  | 4.4843                                                                          |                                                                             |               |                                                                                                                                                                                                                                         |                |               |       |         |        |         |      |         |                                                                                                                                                                                                                                     |        |         |       |       |        |       |      |       |
| POU5F1 | 2.34742                                                                         |                                                                             |               |                                                                                                                                                                                                                                         |                |               |       |         |        |         |      |         |                                                                                                                                                                                                                                     |        |         |       |       |        |       |      |       |
| SOX2   | 3.0303                                                                          |                                                                             |               |                                                                                                                                                                                                                                         |                |               |       |         |        |         |      |         |                                                                                                                                                                                                                                     |        |         |       |       |        |       |      |       |
| Symbol | q value                                                                         |                                                                             |               |                                                                                                                                                                                                                                         |                |               |       |         |        |         |      |         |                                                                                                                                                                                                                                     |        |         |       |       |        |       |      |       |
| NANOG  | 0                                                                               |                                                                             |               |                                                                                                                                                                                                                                         |                |               |       |         |        |         |      |         |                                                                                                                                                                                                                                     |        |         |       |       |        |       |      |       |
| POU5F1 | 0                                                                               |                                                                             |               |                                                                                                                                                                                                                                         |                |               |       |         |        |         |      |         |                                                                                                                                                                                                                                     |        |         |       |       |        |       |      |       |
| SOX2   | 0                                                                               |                                                                             |               |                                                                                                                                                                                                                                         |                |               |       |         |        |         |      |         |                                                                                                                                                                                                                                     |        |         |       |       |        |       |      |       |
| 11     | Presymptomatic and symptomatic malaria: peripheral blood mononuclear cells      | uninfected baseline vs. acute infection                                     | infection     | 3.3                                                                                                                                                                                                                                     | 0.0            | 0.0000        |       |         |        |         |      |         |                                                                                                                                                                                                                                     |        |         |       |       |        |       |      |       |
| 12     | Plasma cell dyscrasias                                                          | monoclonal gammopathy of undetermined significance vs. plasma cell leukemia | disease state | 2.7                                                                                                                                                                                                                                     | 0.0            | 0.0273        |       |         |        |         |      |         |                                                                                                                                                                                                                                     |        |         |       |       |        |       |      |       |
|        |                                                                                 |                                                                             |               | <table border="1"> <thead> <tr> <th>Symbol</th> <th>Fold</th> </tr> </thead> <tbody> <tr> <td>NANOG</td> <td>3.41297</td> </tr> <tr> <td>POU5F1</td> <td>2.25734</td> </tr> <tr> <td>SOX2</td> <td>2.39808</td> </tr> </tbody> </table> | Symbol         | Fold          | NANOG | 3.41297 | POU5F1 | 2.25734 | SOX2 | 2.39808 | <table border="1"> <thead> <tr> <th>Symbol</th> <th>q value</th> </tr> </thead> <tbody> <tr> <td>NANOG</td> <td>0.017</td> </tr> <tr> <td>POU5F1</td> <td>0.045</td> </tr> <tr> <td>SOX2</td> <td>0.02</td> </tr> </tbody> </table> | Symbol | q value | NANOG | 0.017 | POU5F1 | 0.045 | SOX2 | 0.02  |
| Symbol | Fold                                                                            |                                                                             |               |                                                                                                                                                                                                                                         |                |               |       |         |        |         |      |         |                                                                                                                                                                                                                                     |        |         |       |       |        |       |      |       |
| NANOG  | 3.41297                                                                         |                                                                             |               |                                                                                                                                                                                                                                         |                |               |       |         |        |         |      |         |                                                                                                                                                                                                                                     |        |         |       |       |        |       |      |       |
| POU5F1 | 2.25734                                                                         |                                                                             |               |                                                                                                                                                                                                                                         |                |               |       |         |        |         |      |         |                                                                                                                                                                                                                                     |        |         |       |       |        |       |      |       |
| SOX2   | 2.39808                                                                         |                                                                             |               |                                                                                                                                                                                                                                         |                |               |       |         |        |         |      |         |                                                                                                                                                                                                                                     |        |         |       |       |        |       |      |       |
| Symbol | q value                                                                         |                                                                             |               |                                                                                                                                                                                                                                         |                |               |       |         |        |         |      |         |                                                                                                                                                                                                                                     |        |         |       |       |        |       |      |       |
| NANOG  | 0.017                                                                           |                                                                             |               |                                                                                                                                                                                                                                         |                |               |       |         |        |         |      |         |                                                                                                                                                                                                                                     |        |         |       |       |        |       |      |       |
| POU5F1 | 0.045                                                                           |                                                                             |               |                                                                                                                                                                                                                                         |                |               |       |         |        |         |      |         |                                                                                                                                                                                                                                     |        |         |       |       |        |       |      |       |
| SOX2   | 0.02                                                                            |                                                                             |               |                                                                                                                                                                                                                                         |                |               |       |         |        |         |      |         |                                                                                                                                                                                                                                     |        |         |       |       |        |       |      |       |
| 13     | Various normal pure cell cultures                                               | epithelial vs. endothelial                                                  | cell type     | 2.6                                                                                                                                                                                                                                     | 0.0            | 0.0047        |       |         |        |         |      |         |                                                                                                                                                                                                                                     |        |         |       |       |        |       |      |       |
